# Supplementary material
Source: Royal Society of Chemistry journal article supplement (doi:10.1039/d6ce00322b)
Supplement: d6ce00322b1.pdf [file d6ce00322b1.pdf]

Supporting information

# Crystal Engineering to Improve the Dissolution Behaviour of Oleanolic Acid

Junyan Luo<sup>1</sup>, Yifei Xie<sup>1,2</sup>, Ying Feng<sup>1</sup>, Boxi Zhang<sup>1</sup>, Ningbo Gong<sup>1,\*</sup>, and Yang Lu<sup>1,\*</sup>

*1 Beijing Key Laboratory of Innovative Drug Discovery and Polymorphic Research for Cerebrovascular Diseases, Institute of Materia Medica, Chinese Academy of Medical Sciences and Peking Union Medical College, Beijing 100050, China.*

*2 Beijing City Key Laboratory of Drug Target Identification and Drug Screening, Institute of Materia Medica, Chinese Academy of Medical Sciences and Peking Union Medical College, Beijing 100050, China.*

---

\* Corresponding author.

E-mail: [gnb@imm.ac.cn](mailto:gnb@imm.ac.cn) (N. B. Gong); [luy@imm.ac.cn](mailto:luy@imm.ac.cn) (Y. Lu).

## Table of Contents

Figure 1S. The stability results of OA and the four solid forms of OA-PIP. (a) OA, (b) Form I, (c) Form II, (d) Form III, (e) Form IV.

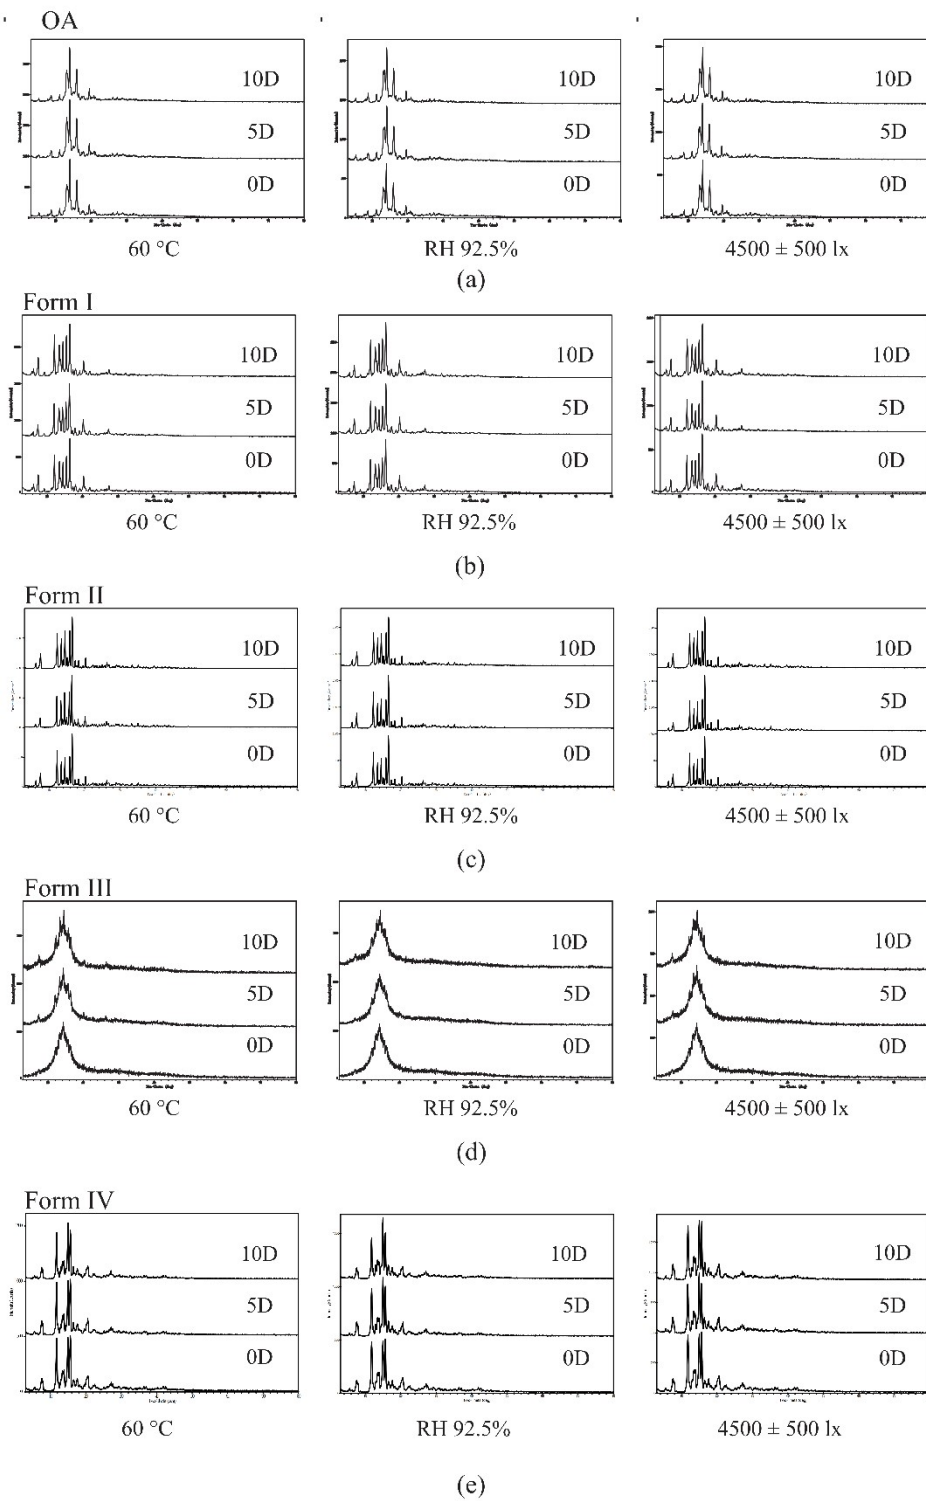

**Figure 1S.** The stability results of OA and the four solid forms of OA-PIP. (a) OA, (b) Form I, (c) Form II, (d) Form III, (e) Form IV.
